# Supplementary figures and images for: Using graph theory to analyze biological networks
Source: Springer Nature journal article supplement (doi:10.1186/1756-0381-4-10), 2011-04-28

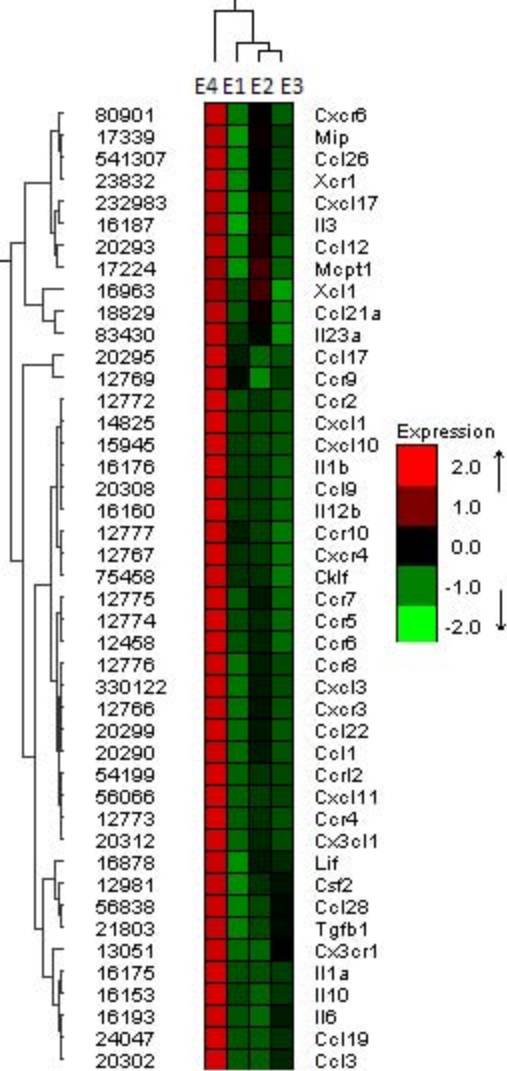

Supplement: 13040_2010_42_MOESM10_ESM.pdf [file 13040_2010_42_MOESM10_ESM.pdf]
